# Supplementary material for: Comparison of Plasma and Urine Biomarker Performance in Acute Kidney Injury
Source: PLOS journal article supplement (doi:10.1371/journal.pone.0145042), 2015-12-15
Supplement: S9 (10.1371/journal.pone.0145042.s009) [file journal.pone.0145042.s009]

**S4 Table: AUC-ROC analyses for early diagnosis of AKI with renal biomarkers after adult cardiac surgery in comparison to recent studies from the literature**

|                    | <b>This study<br/>2h</b> | <b>This study<br/>4h</b> | <b>TRIBE-AKI<br/>“mild”</b> | <b>TRIBE-AKI<br/>“severe”</b> | <b>Ho et al.<br/>[17]</b> |
|--------------------|--------------------------|--------------------------|-----------------------------|-------------------------------|---------------------------|
| <b>pNGAL</b>       | 0.81                     | 0.83                     | 0.67                        | 0.70                          | 0.71                      |
| <b>pCystatin C</b> | 0.72                     | 0.76                     |                             |                               | 0.69                      |
| <b>pL-FABP</b>     | 0.72                     | 0.73                     |                             |                               |                           |
| <b>uIL-18</b>      | 0.69                     | 0.58                     | 0.65                        | 0.74                          | 0.66                      |
| <b>uACR</b>        | 0.63                     | 0.65                     | 0.57                        | 0.59                          |                           |
| <b>uCystatin C</b> | 0.62                     | 0.61                     | 0.67                        | 0.72                          | 0.63                      |
| <b>uKIM1</b>       | 0.61                     | 0.56                     |                             | 0.71                          | 0.72                      |
| <b>uNGAL</b>       | 0.57                     | 0.61                     | 0.61                        | 0.67                          | 0.72                      |
| <b>uL-FABP</b>     | 0.57                     | 0.60                     |                             | 0.61                          | 0.72                      |

In this study AKI was defined by the AKIN serum creatinine criteria within 72h after surgery. In the TRIBE-AKI study “severe” AKI was defined as AKIN stage  $\geq 2$  based on serum creatinine criteria during the entire hospital stay [5,8,65,66]. “Mild” AKI was defined either as RIFLE stage “R” serum creatinine criteria or requirement of acute dialysis [5] or AKIN stage 1 serum creatinine criteria during the entire hospital stay [65,66]. In this study plasma and urine samples were collected 2 or 4h after discontinuation of CPB, whereas in the TRIBE-AKI study first postoperative samples (0- to 6-hour time point) were taken at a median of 0.25 (IQR 0.1 to 0.5) hours after arrival to the ICU. In contrast to the TRIBE-AKI study, in this study urine biomarkers were normalized to urinary creatinine. Data from the TRIBE-AKI study were summarized from [5,8,65,66].
